# Supplementary material for: The Role of Stimulus Characteristics in Visual Attention: An Eye-Tracking Study
Source: Research Square preprint supplement (doi:10.21203/rs.3.rs-8301335/v1), 2026-01-13
Supplement: Supplementary file 1 [file 97282b024bcde9af95af9b37.docx]

**Supplementary Material**

**Table S1**

*Means and Standard Errors**for Each Characteristic of the Visual Stimuli with Total Fixation Duration (TFD), Visits, and Time to First Fixation (TFF)*

|  | Social  *M*(*SD*) | | Distractor  *M*(*SD*) | | Congruency  *M*(*SD*) | | Level of interest  *M*(*SD*) | |
| --- | --- | --- | --- | --- | --- | --- | --- | --- |
| TFD | *F*(1, 729.24) = 11.64, *p* = .001 | | *F*(1, 729.03) = .87, *p*= .353 | | *F*(1, 729.08) = 14.76, *p*= .000 | | *F*(1, 729.033) = 39.21, *p* = .000 | |
| Social | Nonsocial | Few | Many | Congruent | Noncongruent | Central | Marginal |
| .97 (.058) | 1.07 (.058) | 1.03 (.058) | 1.01 (.058) | .97 (.058) | 1.08 (.058) | .93 (.057) | 1.11 (.057) |
| Visits | *F*(1, 729.38) = .075, *p*= .784 | | *F*(1, 728.21) = 10.88, *p* = .001 | | *F*(1, 728.45) = 52.74, *p*= .000 | | *F*(1, 728.20) = 22.62, *p* = .000 | |
| Social | Nonsocial | Few | Many | Congruent | Noncongruent | Central | Marginal |
| 1.49 (.031) | 1.50 (.031) | 1.43 (.031) | 1.55 (.031) | 1.37 (.031) | 1.61 (.031) | 1.41 (.031) | 1.58 (.031) |
| TFF | *F*(1, 777) = 1.80, *p* = .180 | | *F*(1, 777) = .15, *p* = .695 | | *F*(1, 777) = .67, *p* = .413 | | *F*(1, 777) = .50, *p* = .481 | |
| Social | Nonsocial | Few | Many | Congruent | Noncongruent | Central | Marginal |
| .68 (.009) | .67 (.009) | .67 (.009) | .68 (.009) | .68 (.009) | .67 (.009) | .67 (.009) | .68 (.009) |

*Note*. The results are in milliseconds.

**Table S2**

*Stepwise Multiple Linear Regression for Total Fixation Duration (TFD), Visits, and Time to First Fixation (TFF)*

|  |  | R2 Δ | β |
| --- | --- | --- | --- |
| TFD | Step 1 | *F*(1, 777) = 20.904, *p* < .001, *R*2 = 0.26 | |
|  | Level of interest | 0.260 | 0.162*** |
|  | Step 2 | *F*(2, 776) = 14.493, *p* < .001, *R*2 = 0.36 | |
|  | Level of interest |  | 0.162*** |
|  | Congruency | 0.100 | 0.099** |
|  | Social | 0.009 | 0.092* |
| Visits | Step 1 | *F*(1, 776) = 49.164, *p* < .001, *R*2 = 0.060 | |
|  | Congruency | 0.060 | 0.244*** |
|  | Step 2 | *F*(2, 775) = 36.605, *p* < .001, *R*2 = 0.086 | |
|  | Congruency |  | 0.244*** |
|  | Level of interest | 0.027 | 0.163*** |
|  | Step 3 | *F*(3, 776) = 28.322, *p* < .001, *R*2 = 0.099 | |
|  | Congruency |  | 0.244*** |
|  | Level of interest |  | 0.163*** |
|  | Distractors | 0.010 | 0.112*** |
| TFF | Enter | *F*(4, 774) = 0.777, *p* = 0.540, *R*2 = 0.004 | |
|  | Social |  | -0.048 |
|  | Level of interest |  | 0.025 |
|  | Congruency |  | -0.029 |
|  | Distractors | 0.014 |  |

*Note*. **p* < .05; ***p* < .01; ****p* < .001.
